# Supplementary material for: A comparison of two snapshot studies half a century apart suggests stability in a Pacific Northwest winter forest bird community
Source: Frontiers journal article supplement (doi:10.3389/fbirs.2024.1304026), 2024-02-27
Supplement: Table_1.docx [file Table_1.docx]

Supplemental Materials:

Supplemental Table 1. Comparison of the mean (SD) number of birds of our six most frequently detected species at points in Anderson plots 6 and 7 versus points (out), that is, immediately adjacent to plots 6 and 7. Points out of the plot were in the same habitat as points inside and within 250 m of the original quarter section boundaries.

| **Species** | **“In” Mean + SD** | **“Out” Mean + SD** |
| --- | --- | --- |
| Plot 6 |  |  |
| Chestnut-backed Chickadee | 0.14 + 0.54 | 0.21 + 0.89 |
| Pacific Wren | 0.69 + 0.98 | 0.70 + 1.21 |
| Golden-crowned Kinglet | 0.11 + 0.46 | 0.14 + 0.59 |
| Brown Creeper | 0.28 + 0.79 | 0.21 + 0.60 |
| Red-breasted Nuthatch | 0.31 +1.04 | 0.43 + 1.0 |
| Dark-eyed Junco | 0 + 0 | 0.01 + 0.09 |
| Plot 7 |  |  |
| Chestnut-backed Chickadee | 0.77 + 2.74 | 0.24 + 0.90 |
| Pacific Wren | 0.46 + 0.83 | 0.42 + 0.75 |
| Golden-crowned Kinglet | 0.21 + 0.59 | 0.11 + 0.50 |
| Brown Creeper | 0.26 + 0.58 | 0.14 + 0.51 |
| Red-breasted Nuthatch | 0.46 + 0.99 | 0.43 + 0.86 |
| Dark-eyed Junco | 0.02 + 0.22 | 0 + 0 |
